# Supplementary material
Source: PubMed Central journal article supplement (PMC4311921)
Supplement: EC.00282-14_zek999094395so1.pdf [file EC.00282-14_zek999094395so1.pdf]

### Supplementary Table 1: Primers used in this study

| Primer | 5'-3' sequence                                  | Comments        |
|--------|-------------------------------------------------|-----------------|
| AG145  | GATGAGGAGACTGTGAAACAG                           | 161_Tag_Cntrl   |
| AG207  | AGCAGTGCAAAGCCAAAGTT                            | 161_Tag_F       |
| AG147  | gaagcacctgcccagcaccCTTTCCTAAAGAAGTTATACTCAAACC  | 161_Tag_R       |
| AG231  | catgttggatgattttggtag                           | 161_SN1         |
| AG232  | tgggtcatgtgtggttagtg                            | 161_SN2         |
| AG257  | GACCTGCAGCGTACGAAGCTTCgatactcaagctccaggaaaag    | 161_SN3         |
| AG208  | CTCGAATTCATCGATGATATCAGAgggcattttaattcgacag     | 161_SN4         |
| AG209  | ccaagaacaatgggcta                               | 161_SN5         |
| AG150  | cacacctagaccaaattg                              | 161_SN6         |
| AG070  | GAGGAACAAACCGATTCTATTG                          | 167_Tag_Cntrl   |
| AG220  | CTACCGGTGCCAGCTCTATT                            | 167_Tag_F       |
| AG356  | gatatatctggcaagtgggtg                           | 167_SN1         |
| AG357  | ctcgtattgttagccatgggtg                          | 167_SN2         |
| AG358  | GACCTGCAGCGTACGAAGCTTCcaatctgacacatggtagctc     | 167_SN3         |
| AG221  | CTCGAATTCATCGATGATATCAGAccccacgtaaccaatgtat     | 167_SN4         |
| AG222  | ttgggtggtccgtagagaca                            | 167_SN5         |
| AG178  | GAAAACCGCATTATTGGATTATG                         | 167-2_Tag_Cntrl |
| AG214  | GGTGAGAGAGCTACCACTTTTGA                         | 167-2_Tag_F     |
| AG180  | gaagcacctgcccagcaccTTTTCCGTTTAATTGCCCTTCC       | 167-2_Tag_R     |
| AG181  | CTCGAATTCATCGATGATATCAGACTTCTAACTATGTTCAATTAATC | 167-2_SN4       |
| AG182  | caacaataaggcgaagaattcag                         | 167-2_SN5       |
| AG183  | GTAAAGGAAATGGTTGCTTCTG                          | 167-2_SN6       |
| AG184  | GAAGAAAGATGGTCCTGAATTG                          | 167-3_Tag_Cntrl |
| AG216  | AACCATGATTCATCCGAAGC                            | 167-3_Tag_F     |
| AG217  | gaagcacctgcccagcaccCTCAACATAGTTATTAGGTACAAATCCA | 167-3_Tag_R     |
| AG102  | CTTACTAATCGTGGTCGTTTG                           | 167-3_SN1       |
| AG103  | GTAAAGAGAAGATCTATGGAGAC                         | 167-3_SN2       |
| AG104  | GACCTGCAGCGTACGAAGCTTCCTATCAGTAGTAAATTGAAAGGAGG | 167-3_SN3       |
| AG218  | CTCGAATTCATCGATGATATCAGAttttggtagcttttctctctttt | 167-3_SN4(2)    |
| AG219  | attggagcgcagataggttg                            | 167-3_SN5(2)    |
| AG189  | GATTTGGACTTGTGGGTATC                            | 167-3_SN6       |
| AG151  | CTGTATTAAATCCAATTGCCAG                          | 162_Tag_Cntrl   |
| AG152  | CAACAAATATATCACCATCGATG                         | 162_Tag_F       |
| AG211  | gaagcacctgcccagcaccATCTAACCCACTAGTGATGTCTAACTT  | 162_Tag_R       |
| AG254  | ctagttttttttggagtgggag                          | 162_SN1         |

|       |                                                               |                   |
|-------|---------------------------------------------------------------|-------------------|
| AG255 | caataatccaaataaatcaagagac                                     | 162_SN2           |
| AG256 | GACCTGCAGCGTACGAAGCTTCgatatgtgtgatgctatggttg                  | 162_SN3           |
| AG212 | CTCGAATTCATCGATGATATCAGAggaccataaaataatagttgtgctt             | 162_SN4           |
| AG213 | agtttttcgcatcgctcgt                                           | 162_SN5           |
| AG156 | ctttctctttctatttctcacttttc                                    | 162_SN6           |
| AG171 | GAAGAAGAAGAAGAAGAGGCTC                                        | Abp1_Tag_Cntrl    |
| AG172 | CGAAAAGGACGAAGATAATG                                          | Abp1_Tag_F        |
| AG173 | GAAGCACCTGCGCCAGCACCTCATTCAAGACAACATAGTTAGC                   | Abp1_Tag_R        |
| AG174 | CTCGAATTCATCGATGATATCAGAGATAAATTGGTGCTATAGCCAG                | Abp1_SN4          |
| AG175 | GTTGCCACACAGAAGTTTTAC                                         | Abp1_SN5          |
| AG176 | TTCAACAAAACATTTAGGAGATTAC                                     | Abp1_SN6          |
| AG075 | catttcggaatagtagtacccttg                                      | 167_SN6           |
| AG169 | aaaCTGCAGggtgctggcgcagggtctctGTTTCAAAAGGTGAAGAAGATAA<br>TAT   | yEmRFP_PstI_F     |
| AG170 | tGGCGCGCCTTATTTATATAATTCATCCATACCACC                          | yEmRFP_AscI_R     |
| AG157 | TCGACCCCGGGCGCGCCTAGATCTGCCATGGCCCTGCAGAA                     | pPC_MCS-Asc-Nco-F |
| AG158 | CTAGTTCTGCAGGGCCATGGCAGATCTAGGCGCGCCCGGGG                     | pPC_MCS-Asc-Nco-R |
|       | TCGAGCGCTGAACAAAAATTGATTTCTGAAGAGGATTTGTCTGGGTC               | pPC_MYC-F         |
| AG159 | GACCCCGGG<br>CGCGCCCGGGGTCGACCCAGACAAAATCCTCTTCAGAAATCAATTTTT | pPC_MYC-R         |
| AG160 | G TTCAGCGC<br>TCGAGCGCTTATCCTTATGATGTTCCAGATTATGCTTCTGGGTCGAC | pPC_HA-F          |
| AG161 | CCCGGG<br>CGCGCCCGGGGTCGACCCAGAAGCATAATCTGGAACATCATAAGGAT     | pPC_HA-R          |
| AG162 | AAGCGC                                                        |                   |
| AG108 | GAGAGATCTAACATGTTGAGTTTTAAAGGGTTTACCAAGG                      | ScRvs167Bar_F1    |
| AG111 | CAAGCGGCCGCTCGAGTTAgccaggagctgccgtac                          | ScRvs167Bar_R3    |
| AG113 | GAGAGATCTGCCATGGGATCTTGGGGAGGATTTAAGAAAG                      | CaRVS161Bar_F1    |
| AG115 | CAAGCGGCCGCGCGGCTACTTTCCTAAAGAAGTTATACTCAA                    | CaRVS161Bar_R1    |
| AG116 | GAGGGATCCATGGGATCATGGATAGGAATTAAGAAAGCT                       | CaRVS162Bar_F1    |
| AG118 | CAAGCGGCCGCTCGAGTCAATCTAACCCACTAGTGATGTC                      | CaRVS162Bar_R1    |
| AG119 | GAGGGATCCATGGTTGTGGATCAATTGAAAAAT                             | CaNH2Bar_F1       |
| AG120 | GAGGGATCCATGGGAACCAGAGATTACGATAAGGATG                         | CaNH2Bar_F2       |
| AG123 | CAAGCGGCCGCTCGAGTTATTTCTCGTGCACAAATTGTTAG                     | CaNH2Bar_R2       |
| AG124 | GAGGGATCCATGGGAAGTTGGGAAGGTTTTAAGAAAG                         | ScRvs161Bar_F1    |
| AG125 | CAAGCGGCCGCTCGAGTTATTTTATCCCGAGCGCACA                         | ScRvs161Bar_R1    |
| AG126 | GAGGGATCCATGGGATCATTTAAAGGATTCAAAAAGGG                        | CaRvs167Bar_F1    |
| AG127 | GAGGGATCCATGGGAGAAATCACCCAAGATGC                              | CaRvs167Bar_F2    |
| AG130 | CAAGCGGCCGCGGTTACCCGACTTTGAAATGAGTGA                          | CaRvs167Bar_R2    |

|       |                                                    |                    |
|-------|----------------------------------------------------|--------------------|
| AG114 | GAGAGATCTGCCATGGGAAAGACTATGGATAAGGACTTTGATG        | CaRVS161Bar_F2     |
| AG070 | GAGGAACAAACCGATTCTATTG                             | 167_TAPtag_Control |
| AG075 | catttcggaatagtagtaccactg                           | 167_SN6            |
| AG226 | cagcacctgcagcgtacTAATTGCACATAATTACCAGGGA           | 167_Tag_R          |
| AG227 | tctgccggtctccctatagttgcattcatcaaatgaagctg          | 167_SN4(3)         |
| AG228 | tctgccggtctccctatagtcataatttagccccacgtaacc         | 167_SN4(4)         |
| AG105 | GTGTTTTTCGTTTCTATTAGGAG                            | Rvs167_2_SN1       |
| AG106 | CTCACAGGTTTCTGCAGTATAC                             | Rvs167_2_SN2       |
| AG107 | GACCTGCAGCGTACGAAGCTTCCAATCGGTAAGATGATATATATCTG    | Rvs167_2_SN3       |
| AG215 | CTCGAATTCATCGATGATATCAGAgacaatttccttctaactatgttcaa | Rvs167_2_SN4(2)    |

## Supplementary Table 2: Plasmids used in this study

| Name          | Vector-insert                | Purpose              | Source     |
|---------------|------------------------------|----------------------|------------|
| <b>pAG103</b> | pGEMT-easy-Sc161_FL          | Cloning facilitation | This study |
| <b>pAG105</b> | pGEMT-easy-Sc167_BAR         | Cloning facilitation | This study |
| <b>pAG108</b> | pGEMT-easy-Ca161_FL          | Cloning facilitation | This study |
| <b>pAG109</b> | pGEMT-easy-Ca161(-H0)        | Cloning facilitation | This study |
| <b>pAG113</b> | pGEMT-easy-Ca167_BAR(+H0)    | Cloning facilitation | This study |
| <b>pAG114</b> | pGEMT-easy-Ca167_BAR(-H0)    | Cloning facilitation | This study |
| <b>pAG128</b> | pGEMT-easy-Ca162_FL          | Cloning facilitation | This study |
| <b>pAG125</b> | pGEMT-easy-Ca167-3(+H0)      | Cloning facilitation | This study |
| <b>pAG126</b> | pGEMT-easy-Ca167-3(-H0)      | Cloning facilitation | This study |
| <b>pAG202</b> | pPC97mMYC                    | Y2H_BAIT_plasmid     | This study |
| <b>pAB05</b>  | pPC97mMYC-Sc161_FL           | Y2H_BAIT_plasmid     | This study |
| <b>pAB07</b>  | pPC97mMYC-Ca161_FL           | Y2H_BAIT_plasmid     | This study |
| <b>pAB23</b>  | pPC97mMYC-Ca167BAR(+H0)      | Y2H_BAIT_plasmid     | This study |
| <b>pAB27</b>  | pPC97mMYC-Ca167-3BAR(+H0)    | Y2H_BAIT_plasmid     | This study |
| <b>pAB28</b>  | pPC97mMYC-Ca167-3BAR(-H0)    | Y2H_BAIT_plasmid     | This study |
| <b>pAB30</b>  | pPC97mMYC-Ca162_FL           | Y2H_BAIT_plasmid     | This study |
| <b>pAG201</b> | pPC86mHA                     | Y2H_PREY_plasmid     | This study |
| <b>pAB10</b>  | pPC86mHA-Sc167BAR            | Y2H_PREY_plasmid     | This study |
| <b>pAB11</b>  | pPC86mHA-Ca161_FL            | Y2H_PREY_plasmid     | This study |
| <b>pAB14</b>  | pPC86mHA-Ca167BAR(+H0)       | Y2H_PREY_plasmid     | This study |
| <b>pAB15</b>  | pPC86mHA-Ca167BAR(-H0)       | Y2H_PREY_plasmid     | This study |
| <b>pAB18</b>  | pPC86mHA-Ca167-3BAR(+H0)     | Y2H_PREY_plasmid     | This study |
| <b>pAB21</b>  | pPC86mHA-Ca162_FL            | Y2H_PREY_plasmid     | This study |
| <b>pAB16</b>  | pPC86mHA-Ca167-2BAR(+H0)     | Y2H_PREY_plasmid     | This study |
| <b>pAB17</b>  | pPC86mHA-Ca167-2BAR(-H0)     | Y2H_PREY_plasmid     | This study |
| <b>pAB25</b>  | pPC97mMYC-Ca167-2BAR(+H0)    | Y2H_BAIT_plasmid     | This study |
| <b>pAB26</b>  | pPC97mMYC-Ca167-2BAR(-H0)    | Y2H_BAIT_plasmid     | This study |
| <b>pAG259</b> | pETM-41m                     | Protein expression   | This study |
| <b>pAG265</b> | pETM-41m-Ca167BAR(-H0)       | Protein expression   | This study |
| <b>pAG269</b> | pETM-41m-Ca167-3BAR(-H0)     | Protein expression   | This study |
| <b>pAG273</b> | pET-21d(+)-Ca161(-H0)        | Protein expression   | This study |
| <b>pAG281</b> | pET-21d(+)-Ca162_FL          | Protein expression   | This study |
| <b>pAG294</b> | Polycistronic 12 (167/161)   | Protein expression   | This study |
| <b>pAG302</b> | Polycistronic 20 (167-3/162) | Protein expression   | This study |
| <b>pSB02</b>  | pFA-yEmRFP-CdARG4            | C-terminal tagging   | This study |

|               |                          |                                               |            |
|---------------|--------------------------|-----------------------------------------------|------------|
| <b>#696</b>   | pFA-GFP $\gamma$ -CdHIS1 | C-terminal tagging                            | (1)        |
| <b>pIS66</b>  | pFA-3HA-CdHIS1           | C-terminal tagging                            | This study |
| <b>pIS67</b>  | pFA-3HA-CdARG4           | C-terminal tagging                            | This study |
| <b>pJB170</b> | pFA-6MYC-CmLEU2          | C-terminal tagging                            | This study |
| <b>pJB115</b> | pFA-CdHIS1-loxP          | HIS1 disruption with loxP-recombination sites | (2)        |
| <b>pJB109</b> | pFA-CdARG4-loxP          | ARG4 disruption with loxP-recombination sites | (2)        |
| <b>pJB113</b> | pFA-CmLEU2-loxP          | LEU2 disruption with loxP-recombination sites | (2)        |
| <b>pJB116</b> | pFA-CaURA3-loxP          | URA3 disruption with loxP-recombination sites | (2)        |
| <b>pJB171</b> | (CaURA3+CmLeu2)          | Prototrophy reconstitution                    | This study |
| <b>pJB173</b> | (CdARG4+CmLeu2)          | Prototrophy reconstitution                    | This study |

### Supplementary Table 3: Phenotypic screen results summary

|    | STRAIN                       |             | SN14#   | 161ΔΔ   | 167ΔΔ   | 161ΔΔ & 167ΔΔ | 162ΔΔ   | 167-3ΔΔ | 162 ΔΔ & 167-3ΔΔ | 161ΔΔ & 162ΔΔ | 167ΔΔ & 167-3 ΔΔ |
|----|------------------------------|-------------|---------|---------|---------|---------------|---------|---------|------------------|---------------|------------------|
|    | CONDITION                    | CNC         |         |         |         |               |         |         |                  |               |                  |
| 1  | YPD_16°C                     |             | +++     | +++     | +++     | +++           | +++     | +++ (b) | +++ (b)          | +++           | +++              |
| 2  | YPD_28°C                     |             | +++     | +++     | +++     | +++           | +++     | +++     | +++              | +++           | +++              |
| 3  | YPD_37°C                     |             | +++ (y) | +++ (y) | +++ (h) | +++ (h)       | +++ (y) | +++ (y) | +++ (y)          | +++ (y)       | +++ (h)          |
| 4  | YPD_42°C                     |             | +++     | +++     | -       | -             | +++     | +++     | +++              | +++           | -                |
| 5  | YPD_EDTA                     | 0.75M pH8.0 | +++     | +++     | +++     | +++           | +++     | +++ (b) | +++ (b)          | +++           | +++              |
| 6  | YPD_Menadione                | 80μM        | +++     | +++     | +++     | +++           | +++     | +++ (b) | +++ (b)          | +++           | +++              |
| 7  | YPD_H2O2                     | 6.0mM       | +++     | ++      | ++      | ++            | +++     | +++ (b) | +++ (b)          | +++           | ++               |
| 8  | YPD_Caffeine                 | 15mM        | ++      | ++      | ++      | ++            | ++      | ++      | ++               | ++            | ++               |
| 9  | YPD_Rapamycin                | 5nM         | +       | -       | +       | ++            | +++     | +       | +                | -             | +                |
| 10 | YPD_Rapamycin                | 2.5nM       | +++     | +       | ++      | +             | +++     | +++     | +++              | +             | +                |
| 11 | YPD_SDS                      | 0.04%       | +++     | -       | +++     | -             | +++     | +++     | +++              | -             | ++               |
| 12 | YPD_CuSO4                    | 15mM        | +++     | +++     | +++     | +++           | +++     | +++ (b) | +++ (b)          | +++           | +++              |
| 13 | YPD_ZnSO4                    | 5 mM        | -       | -       | -       | -             | -       | -       | -                | -             | -                |
| 14 | YPD_CFW                      | 20μM        | +++     | -       | -       | -             | +++     | +++ (b) | +++ (b)          | -             | -                |
| 15 | YPD_Congo red                | 200 mg/ml   | +++     | -       | -       | -             | +++     | +++     | +++              | -             | -                |
| 16 | YPD_Hepes 7.3                | 150mM       | +++     | +++     | +++     | +++           | +++     | +++ (b) | +++ (b)          | +++           | +++              |
| 17 | YPD_Hepes 8.5                | 150mM       | +++     | +++     | +++     | +++           | +++     | +++ (b) | +++ (b)          | +++           | +++              |
| 18 | YPD_FCS                      | 10%         | +++ (y) | +++ (y) | +++ (h) | +++ (h)       | +++     | +++     | +++              | +++ (h)       | +++ (y)          |
| 19 | Spider_28°C                  |             | +++     | +++     | ++      | +++           | +++     | +++     | +++              | +++           | +++              |
| 20 | Spider_37°C                  |             | +++ (y) | +++ (y) | +++ (h) | +++ (h)       | +++ (y) | +++ (y) | +++ (y)          | +++ (y)       | +++ (h)          |
| 21 | YPD_LiCl                     | 300mM       | +++     | -       | -       | -             | +++     | +++     | +++              | -             | -                |
| 22 | YPD_Sorbitol                 | 1.5M        |         |         |         |               |         |         |                  |               |                  |
| 23 | YPD_NaCl                     | 0.5M        | +++     | +++     | +++     | +++           | +++     | +++ (b) | +++ (b)          | +++           | +++              |
| 24 | YPD_NaCl                     | 1M          | +++     | +++     | +++     | +++           | +++     | +++ (b) | +++ (b)          | +++           | +++              |
| 25 | YPD_NaCl                     | 1.5M        | +++     | -       | -       | -             | +++     | +++ (b) | +++ (b)          | -             | -                |
| 26 | SD_28°C                      |             | +++     | +++     | +++     | +++           | +++     | +++     | +++              | +++           | +++              |
| 27 | SD_28°C_pH2.1                |             | +++     | +++     | +++     | +++           | +++     | +++     | +++              | +++           | +++              |
| 28 | SD_28°C_pH2.6                |             | +++     | +++     | +++     | +++           | +++     | +++     | +++              | +++           | +++              |
| 29 | SD_20°C                      |             | +++     | +++     | +++     | +++           |         |         |                  | +++           | +++              |
| 30 | SD_20°C_pH2.1                |             | +++     | +++     | +++ (s) | +++           |         |         |                  | +++           | +++              |
| 31 | SD_20°C_pH2.6                |             | +++     | +++     | +++ (s) | +++           |         |         |                  | +++           | +++              |
| 32 | SD_16°C                      |             | ++      | ++      | ++      | ++            | ++      | ++      | ++               | ++            | ++               |
| 33 | SD_16°C_pH2.1                |             | ++      | +       | +       | +             | ++      | ++      | ++               | +             | +                |
| 34 | SD_16°C_pH2.6                |             | +++     | ++      | +       | +             | +++     | +++ (b) | +++ (b)          | +             | +                |
| 35 | SD_10°C                      |             | +       | +       | +       | +             |         |         |                  | +             | +                |
| 36 | YNB_w/o(NH4)2SO4             |             | -       | -       | -       | -             | -       | -       | -                | -             | -                |
| 37 | YNB_w/o(NH4)2SO4 +NH4Cl      |             | +++     | +++     | +++     | +++           | +++     | +++     | +++              | +++           | +++              |
| 38 | YNB_w/o(NH4)2SO4 +Ornithine  | 15mM        | +++     | +++     | +++     | +++           | +++     | +++     | +++              | +++           | +++              |
| 39 | YNB_w/o(NH4)2SO4 +Isoleucine | 15mM        | +++     | +++     | +++     | +++           | +++     | +++     | +++              | +++           | +++              |
| 40 | YNB_w/o(NH4)2SO4 +Proline    | 40mM        | +++     | +++     | +++     | +++           | +++     | +++     | +++              | +++           | +++              |
| 41 | YNB_28°C                     |             | -       | -       | -       | -             | -       | -       | -                | -             | -                |
| 42 | YNB_Mannitol                 | 2%          | +++     | +++     | +++     | +++           | +++     | +++     | +++              | +++           | +++              |
| 43 | YNB_Maltose                  | 2%          | +++     | +++     | +++     | +++           | +++     | +++     | +++              | +++           | +++              |
| 44 | YNB_Galactose                | 2%          | +++     | +++     | +++     | +++           | +++     | +++     | +++              | +++           | +++              |
| 45 | YNB_Ethanol                  |             | +++     | +++     | +++     | +++           | +++     | +++     | +++              | +++           | +++              |
| 46 | SD_Canavanine                | 0.5 μg/ml   | +++     | +++ (s) | +++ (s) | +++           | +++     | +++     | +++              | +++ (s)       | +++              |
| 47 | SD_Fluconazole               | 100μM       | +++     | +       | +++     | -             | +++     | +++     | +++              | -/+           | ++               |
| 48 | SD_Fluphenazine              | 0.3mM       | +++     | +++ (s) | +++     | +++ (s)       | +++     | +++     | +++              | +++ (s)       | +++              |
| 49 | SD_Fluphenazine              | 1mM         | +++     | +++ (s) | +++     | +++ (s)       | +++     | +++     | +++ (b)          | +++ (s)       | +++              |
| 50 | SD_Fenpropimorph             | 2μM         | +++     | +++     | +++     | +++           | +++     | +++ (b) | +++ (b)          | +++           | +++              |
| 51 | SD_Fenpropimorph             | 4μM         | +++     | +++     | +++     | +++           | +++     | +++ (b) | +++ (b)          | +++           | +++              |
| 52 | SD_BCS                       | 15mM        | +++     | +++     | +++     | +++           | +++     | +++     | +++              | +++           | +++              |

Cells were pre-grown on either rich (YPD) or minimal (YNB/0.3% glucose) medium, washed twice, resuspended to an OD<sub>600</sub> of 0.2, and serially diluted (1:10). Four micro liters of each dilution was spotted onto agar plates. Growth was scored after 2-5 days incubation at indicated temperatures. -, no growth; +, 1 spot; ++, 2 spots; +++, 3 spots; +++, 4 spots; (b), bigger colonies compared to wild-type strain; (s), smaller colonies compared to wild-type strain. YNB: Minimal medium containing 0.67% (w/v) Yeast Nitrogen Base with or without ammonium sulphate (as indicated) and 2% of selected carbon source (carbon source is glucose if not indicated otherwise). SDS, Sodium Dodecyl Sulphate; CFW, Calcofluor White; BCS, Bathocuproinedisulfonic acid (copperchelator). Details of the mechanism of action of the used phenotypic media can be found in (3).

Supplementary figure 1

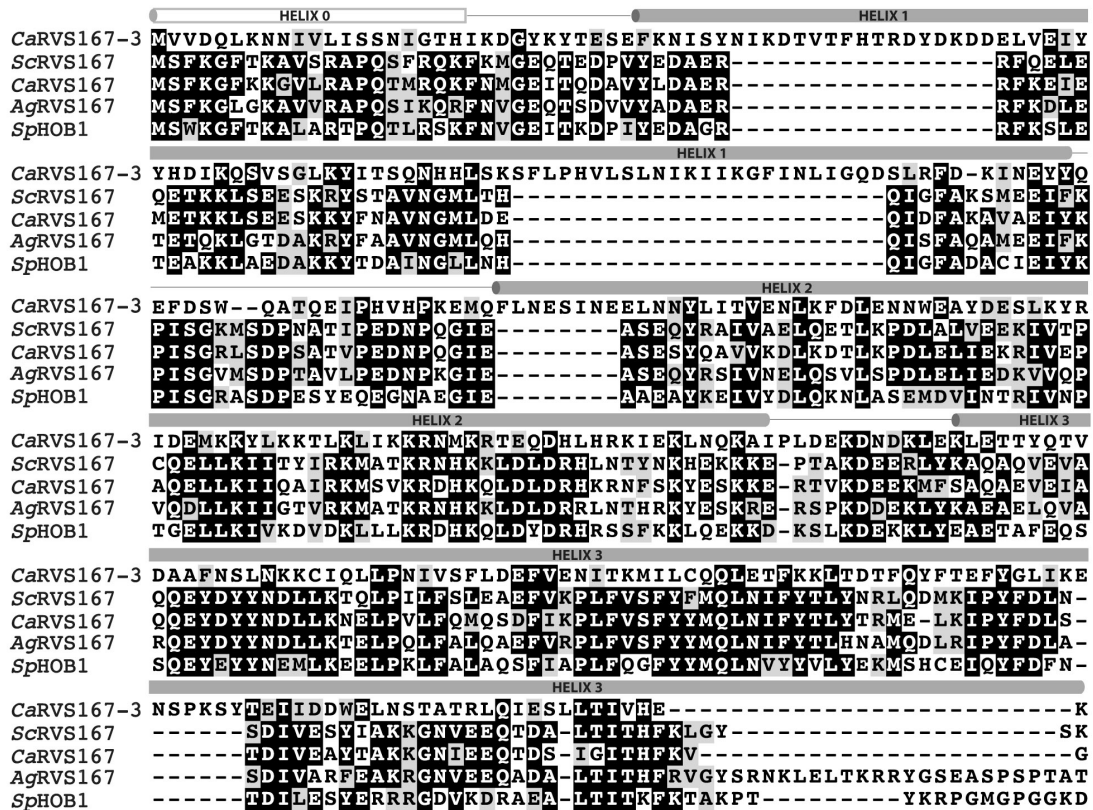

**Supplementary Figure 1. Multiple sequence alignment of the BAR domains of CaRvs167-3 and Rvs167 from different yeast species.** Sequences were aligned using the tcoffee program (<http://tcoffee.crg.cat/apps/tcoffee/do:regular>) and amino acid identities and similarities were highlighted using boxshade (<http://mobyli.pasteur.fr/cgibin/portal.py?#forms::boxshade>). Residues that are identical in at least 3 proteins are shaded black, while those that are similar in at least 3 proteins are shaded grey. Indicated are the predicted  $\alpha$ -helices and the N-terminal amphipathic helix (H0). *Ca*, *Candida albicans*; *Sc*, *Saccharomyces cerevisiae*; *Ag*, *Ashbya gossypii*; *Sp*, *Schizosaccharomyces pombe*.

Supplementary figure 2

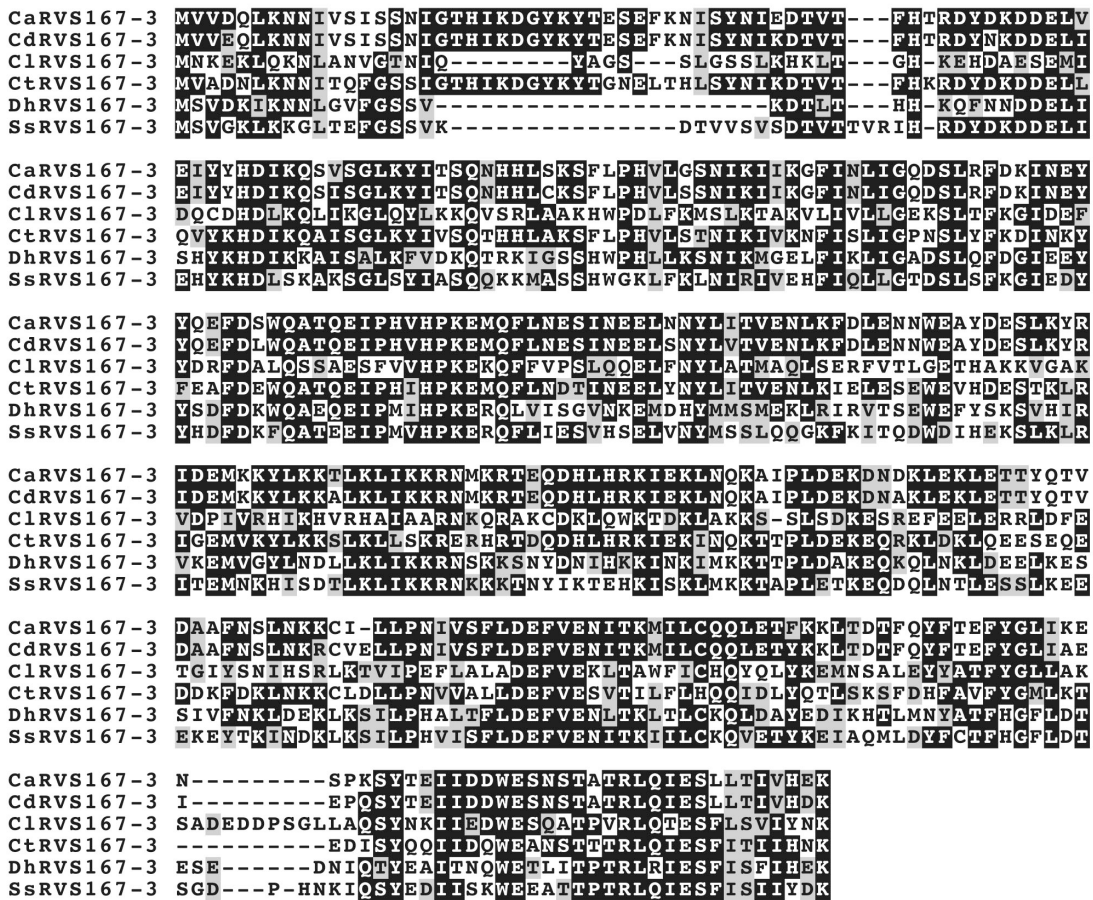

**Supplementary Figure 2. Multiple sequence alignment of Rvs167-3 orthologs.** Sequences were aligned using the tcoffee program (<http://tcoffee.org.cat/apps/tcoffee/do:regular>) and amino acid identities and similarities were highlighted using boxshade (<http://mobyli.pasteur.fr/cgi-bin/portal.py?#forms::boxshade>). Residues that are identical in at least 3 proteins are shaded black, while those that are similar in at least 3 proteins are shaded grey. *Ca*, *Candida albicans*; *Cd*, *Candida dubliniensis*; *Cl*, *Candida lusitanae*; *Ct*, *Candida tropicalis*; *Dh*, *Debaryomyces hansenii*; *Ss*, *Scheffersomyces stipitis*;



Supplementary Figure 3

A.

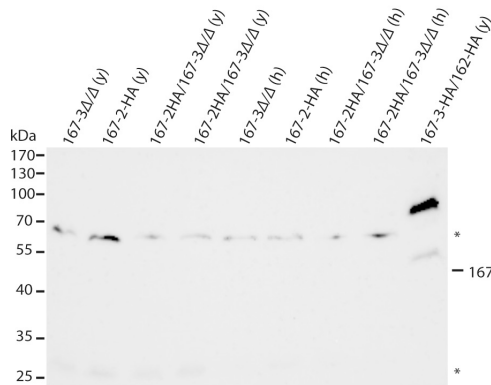

B.

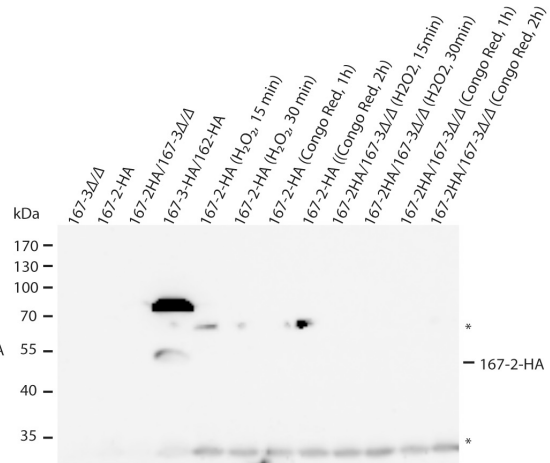

**Supplementary Figure 3. Rvs167-2-HA expression.** Immunoblot analysis of HA-tagged Rvs167-2 in wild type and *rvs167-3*  $\Delta/\Delta$  mutant (A). The indicated strains were grown to mid-logarithmic phase in YPD or in YPD+10% FCS to test for protein expression in yeast (y) and hyphal (h) cells, respectively. Cells were then lysed and protein extracts were analyzed by SDS-PAGE and immunoblotting. Blots were probed with antibodies directed against HA. Expected running position of Rvs167-2-HA (calculated molecular weight 45.8kDa) is indicated. (B) Rvs167-2-HA expression under oxidative stress (5 mM  $H_2O_2$ ) and cell wall stress caused by Congo Red (100  $\mu$ M) in both wild type and *rvs167-3*  $\Delta/\Delta$  mutant cells. Protein extracts were prepared and analyzed by immunoblotting. Lysates of a double-tagged 167-3-HA/162-HA strain were loaded as positive control. Asterisk (\*) indicates cross-reacting band.

## Supplementary Figure 4

A.

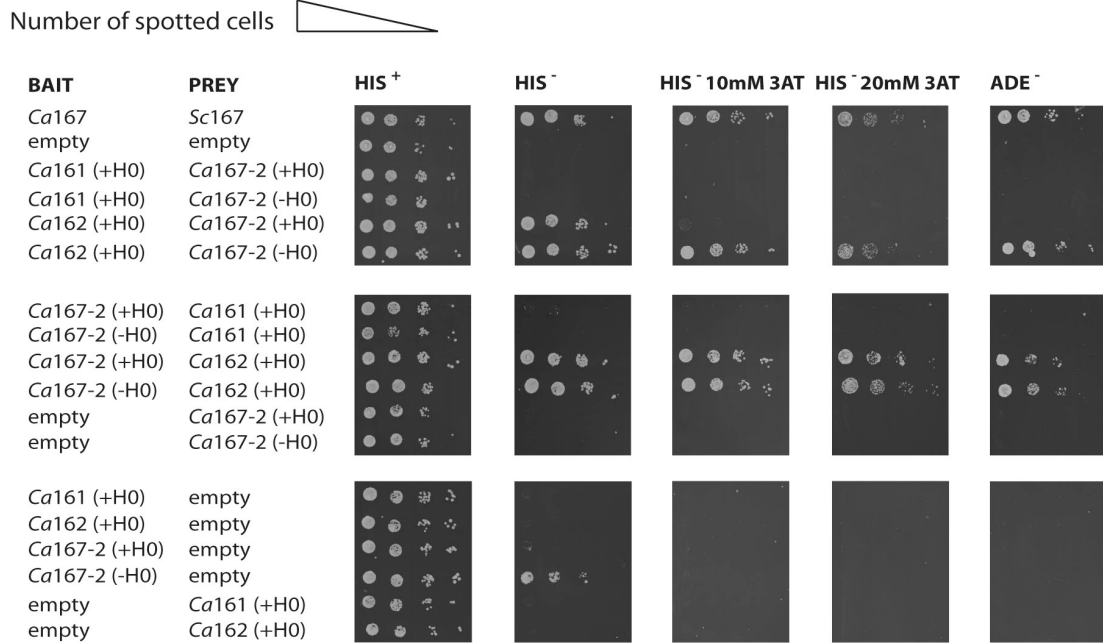

B.

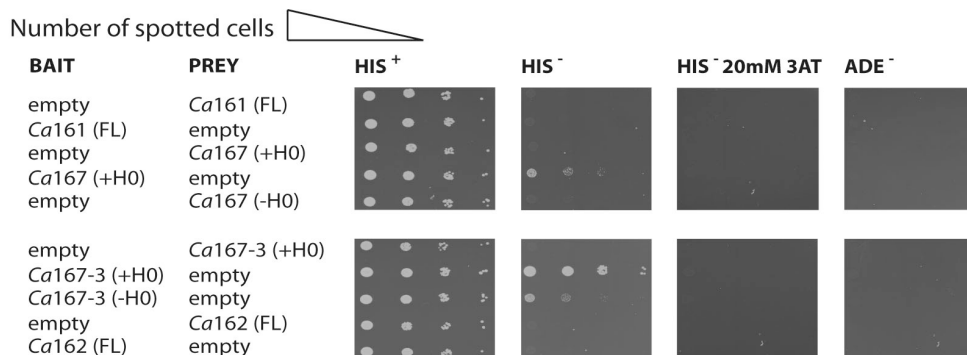

**Supplementary Figure 4. Yeast-2-Hybrid control experiments.** Serial dilutions of strains co-transformed with the indicated bait and prey constructs were spotted on minimal plates with histidine (His<sup>+</sup>), without histidine (His<sup>-</sup>), without histidine and containing 20mM 3-amino-1,2,4-triazole (3AT) and without adenine (Ade<sup>-</sup>). (A) The BAR domain of Rvs167-2 (without H<sub>0</sub>) interacts strongly in both orientations with Rvs162 but not with Rvs161. All Rvs167 paralogs show weak self-activation when present in the bait plasmid as revealed by growth on His<sup>-</sup> plates (A, bottom panel and B).

Supplementary Figure 5

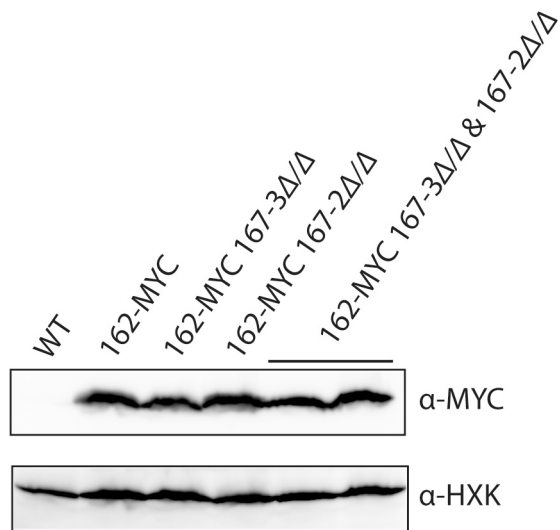

**Supplementary Figure 5. Rvs162 levels in the absence of its binding partners.** Immunoblot analysis of protein extracts of wild type and *rvs* deletion strains expressing 6MYC tagged Rvs-162 protein. The indicated strains were grown to mid-logarithmic phase in YPD, lysed and protein extracts were analyzed by SDS- PAGE and immunoblotting. Blots were probed with antibodies directed against MYC and hexokinase (HXK) as loading control.

## Supplementary Figure 6

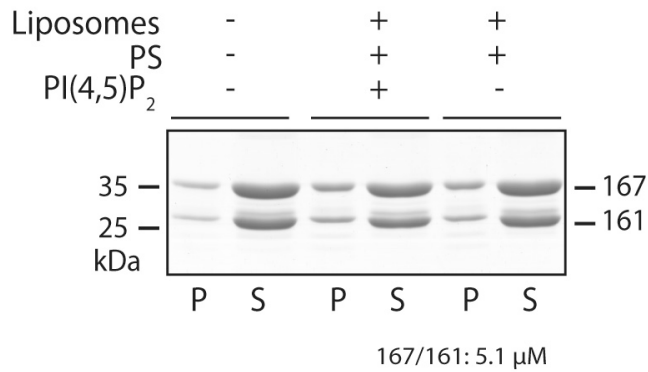

**Supplementary Figure 6. The Rvs161/Rvs167 heterodimer bind membranes *in vitro*.** Lipid co-sedimentation experiment showing that membrane binding of the purified Rvs161/Rvs167 heterodimer at high protein concentration (5.1 μM) is not substantially increased as compared to low protein concentration (1.7 μM) (see also Figure 7B). Experiment was carried out as described in the legend to Figure 7.

Supplementary Figure 7

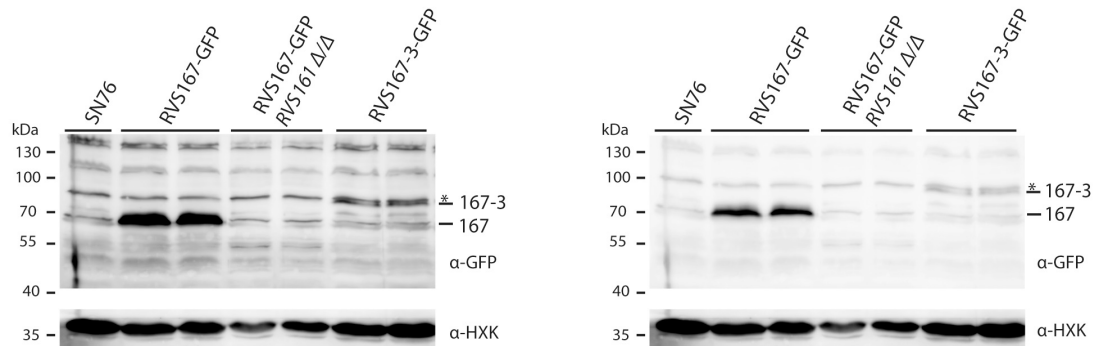

**Supplementary Figure 7: GFP tagging does not interfere with Rvs167 and Rvs167-3 function.** Immunoblot analysis of wild type and *rvs* deletion strains expressing GFP tagged Rvs proteins. The indicated strains were grown to mid-logarithmic phase in YPD, lysed and protein extracts were analyzed by SDS-PAGE and immunoblotting. Blots were probed with antibodies directed against GFP and hexokinase (HXK) as loading control.

Supplementary Figure 8

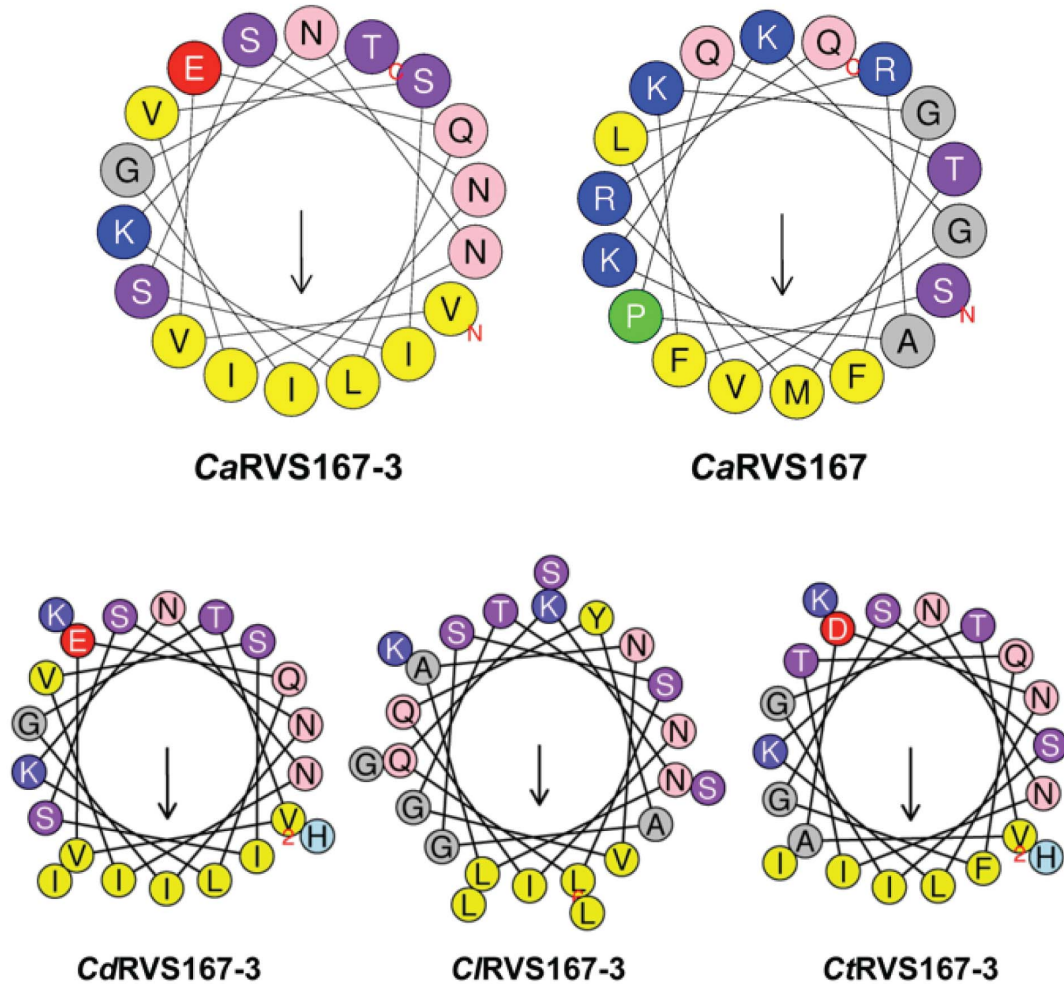

**Supplementary Figure 8: Amphipathic Helixes.** Helical-wheel representation of the amphipathic helix of *CaRvs167-3* (residues 2-19) and *CaRvs167* (residues 2-19), and of *Rvs167-3* orthologs in *C. dubliniensis* (residues 2-22), *C. lusitaniae* (residues 6-29) and *C. tropicalis* (residues 2-22). Yellow, hydrophobic residues; purple, serine and threonine; blue, basic; red, acidic; pink, asparagine and glutamine; gray, other residues. Arrow denotes the hydrophobic face. Helical wheels were created with HeliQuest (<http://heliquest.ipmc.cnrs.fr/>) (4)

## Supplementary references

1. **Zhang C, Konopka JB.** 2010. A photostable green fluorescent protein variant for analysis of protein localization in *Candida albicans*. *Eukaryotic Cell* **9**:224–226.
2. **Strijbis K, van Roermund CWT, Hardy GP, van den Burg J, Bloem K, de Haan J, van Vlies N, Wanders RJA, Vaz FM, Distel B.** 2009. Identification and characterization of a complete carnitine biosynthesis pathway in *Candida albicans*. *The FASEB Journal* **23**:2349–2359.
3. **Homann OR, Dea J, Noble SM, Johnson AD.** 2009. A Phenotypic Profile of the *Candida albicans* Regulatory Network. *PLoS Genet* **5**:e1000783.
4. **Gautier R, Douguet D, Antony B, Drin G.** 2008. HELIQUEST: a web server to screen sequences with specific alpha-helical properties. *Bioinformatics* **24**:2101–2102.
